# 1 **ZapA stabilizes FtsZ filament bundles** 2 **without slowing down treadmilling dynamics**

3  
4 Paulo Caldas<sup>1</sup>, Mar López-Pelegrín<sup>1</sup>, Daniel J.G. Pearce<sup>2</sup>, Nazmi B. Budanur<sup>1</sup>, Jan Brugués<sup>3,4,5,6</sup>  
5 and Martin Loose<sup>1#</sup>

6 <sup>1</sup>Institute of Science and Technology Austria, Klosterneuburg, Austria; <sup>2</sup>School of Chemistry and Biochemistry,  
7 University of Geneva, Switzerland; <sup>3</sup>Max Planck Institute of Molecular Cell Biology and Genetics, Dresden, Germany;  
8 <sup>4</sup>Max Planck Institute for the Physics of Complex Systems, 01187 Dresden, Germany, <sup>7</sup>Centre for Systems Biology  
9 Dresden, 01307 Dresden, Germany <sup>6</sup>Cluster of Excellence Physics of Life, TU Dresden, 01062 Dresden, Germany

10 # corresponding author: Institute for Science and Technology Austria (IST Austria), Am Campus 1, 3400  
11 Klosterneuburg, Austria. Email: martin.loose@ist.ac.at; Telephone: +43 (0) 2243 9000 6301.

12

## 13 **Abstract**

14 For bacterial cell division, treadmilling filaments of FtsZ organize into a ring-like structure at the  
15 center of the cell. What governs the architecture and stability of this dynamic Z-ring is currently  
16 unknown, but FtsZ-associated proteins have been suggested to play an important role. Here, we  
17 used an *in vitro* reconstitution approach combined with fluorescence microscopy to study the  
18 influence of the well-conserved protein ZapA on the organization and dynamics of FtsZ filaments  
19 recruited to a supported membrane. We found that ZapA increases the spatial order and stabilizes  
20 the steady-state architecture of the FtsZ filament network in a highly cooperative manner. Despite  
21 its strong influence on their large-scale organization, ZapA binds only transiently to FtsZ filaments  
22 and has no effect on their treadmilling velocity. Together, our data explains how FtsZ-associated  
23 proteins can contribute to the precision and stability of the Z-ring without compromising  
24 treadmilling dynamics.

25

26

## 1 **Introduction**

2 For cytokinesis, bacteria need to build two new cell poles at the division site. This process is  
3 initiated by a dynamic ring of FtsZ filaments, which forms at the mid-cell early during the cell cycle,  
4 where it persists during the inward growth of the cell septum until it disassembles just before  
5 division is completed<sup>1-4</sup>. Recent studies have shown that this Z-ring not only defines the location  
6 of divisome assembly, but that FtsZ treadmilling drives the movement of peptidoglycan synthases  
7 around the cell diameter, which in turn controls remodeling of the cell wall at the division site<sup>5,6</sup>.  
8 Due to the important role of FtsZ polymerization dynamics for cell wall synthesis, the spatial and  
9 temporal organization of filaments within the Z-ring needs to be tightly controlled. Indeed, bacteria  
10 contain various proteins that directly bind to FtsZ and contribute to the precision of cell division.  
11 For example, mutants of *Escherichia coli* lacking one of the FtsZ-associated proteins ZapA, ZapB,  
12 ZapC or ZapD are usually longer than wild-type cells with a more heterogeneous cell length  
13 distribution. Furthermore, they show mislocalized or misaligned Z-rings and skewed division  
14 septae<sup>7-10</sup>. Despite not being structurally related, all these proteins have similar functions *in vivo*  
15 with their corresponding phenotype becoming even more severe in cells missing more than one  
16 Zap protein. However, the mechanism by which FtsZ-associated proteins contribute to the stability  
17 of the Z-ring and precision of cell division is currently not known.

18 The best characterized of those proteins is ZapA, a widely conserved protein critical for the  
19 positioning and stability of the division machinery<sup>7,8,11</sup>. Structural studies on ZapA from *E. coli* and  
20 *Pseudomonas aeruginosa* revealed that ZapA has two distinct domains. A globular N-terminal  
21 portion that forms the FtsZ-binding domain, and a C-terminal part that forms a 14-turn alpha helix,  
22 responsible to promote the oligomerization of the protein into a pseudosymmetric tetramer<sup>12-14</sup>.  
23 *In vitro* experiments using purified proteins showed that ZapA promotes the formation of stable  
24 FtsZ protofilament bundles and reduces the GTPase activity of FtsZ in solution<sup>15-17</sup>. These two  
25 properties, however, would potentially interfere with the function of FtsZ treadmilling to distribute  
26 cell wall synthases. Accordingly, it is currently not clear how ZapA can contribute to the stability  
27 of the cell division machinery without having a negative effect on the polymerization dynamics of  
28 its main organizer, FtsZ.

29 Here, we used an *in vitro* reconstitution approach recapitulating Z-ring assembly and early events  
30 during divisome maturation. Our biomimetic system combines purified proteins, supported  
31 bilayers and total internal reflection fluorescence (TIRF) microscopy. This allowed us to directly  
32 visualize the polymerization of FtsZ with its membrane anchor FtsA into filament networks and  
33 the influence of ZapA on their architecture and dynamics.

1 Using a novel automated image analysis, we studied the behavior of FtsZ and ZapA on three  
2 different spatial scales: First, we analyzed the spatiotemporal pattern of the membrane-bound  
3 filament network; next, we studied the underlying polymerization dynamics of filament bundles,  
4 and finally, we quantified the behavior of single molecules. Our experiments and quantitative  
5 analyses reveal that ZapA is able to align FtsZ filaments in a highly cooperative manner, giving  
6 rise to two distinct states: a state of low spatial order with fast reorganization dynamics and a  
7 state of high spatial order and slow reorganization dynamics. Importantly, we show that the  
8 treadmilling velocities are identical in these two regimes, demonstrating that ZapA is able to  
9 stabilize filament bundles without affecting FtsZ polymerization dynamics. Our results suggest  
10 that the function of the ZapA-FtsZ interaction is to cooperatively align FtsZ filaments at the division  
11 site, which defines the track for treadmilling and thereby increases the spatiotemporal precision  
12 of cell division.

## 1 **Results**

### 2 **ZapA increases the bundle width of membrane-bound FtsZ filaments**

3 To study the effect of ZapA on the architecture and dynamics of the FtsZ filament network, we  
4 took advantage of an *in vitro* system based on supported lipid bilayers and purified proteins (Fig.  
5 1A). As reported previously, FtsZ and FtsA form treadmilling filaments on supported membranes  
6 when incubated in the presence of ATP and GTP and at a concentration ratio similar to that found  
7 in the living cell (FtsZ : FtsA = 1.5  $\mu$ M : 0.5  $\mu$ M). These filaments further self-organize into dynamic  
8 networks of curved filament bundles<sup>18</sup> (Fig. 1B, top row; Movie S1, left). Next, we performed this  
9 experiment in the presence of defined concentrations of ZapA. At a high concentration of ZapA  
10 (6  $\mu$ M), FtsZ filaments organized into a filament architecture of apparently more aligned and  
11 straightened filament bundles (Fig. 1B, lower row; Movie S1, right). This effect became more  
12 pronounced over time until the system assembled into a stable steady-state after about 15 min,  
13 with an architecture that strongly differed from the pattern found in the absence of ZapA (Fig. 1B).  
14 Following these initial observations, we then used automated image analysis methods to quantify  
15 the influence of ZapA on the organization of membrane-bound FtsZ filaments.

16 As ZapA was previously found to promote lateral interactions between FtsZ protofilaments and  
17 the formation of filament bundles when incubated together in solution<sup>13,16,17</sup>, we first quantified  
18 the apparent width of filament structures on the membrane. For this aim, we used an image  
19 segmentation approach based on the fluorescence intensity followed by distance mapping (Fig.  
20 S1A,B; methods for details). For bundles of membrane-bound FtsZ filaments in the absence of  
21 ZapA, our analysis found a mean width of  $\delta_{t=0} = 0.63 \pm 0.33 \mu$ m, which stayed roughly constant  
22 over time ( $\delta_{ss} = 0.69 \pm 0.06 \mu$ m,  $n = 13$ ; Fig. 1C, blue). In contrast, in the presence of 6.0  $\mu$ M  
23 ZapA, the FtsZ bundle width continuously increased until it plateaued at a slightly higher value of  
24  $\delta_{ss} = 0.76 \pm 0.05 \mu$ m ( $n = 14$ , Fig. 1C, red) at steady state ( $t > 15$  min). As a control, we prepared  
25 ZapA R46A, a mutant of ZapA with an inactive FtsZ binding site (Fig. 1D). As expected, adding  
26 this mutant up to a concentration of 6  $\mu$ M did not change the FtsZ filament pattern and bundles  
27 had the same average width as in the absence of ZapA (Fig. 1E,  $p = 0.081$ ; Fig. S1C,D). To  
28 confirm that only tetrameric ZapA with two pairs of FtsZ binding sites has this effect on FtsZ  
29 filaments, we prepared ZapA I83E, a mutant where the dimer-dimer interaction is disrupted<sup>19</sup> (Fig.  
30 1D). Even though the presence of ZapA I83E slightly changed the appearance of FtsZ filaments  
31 (Fig. S1C, top row), we did not observe a significant degree of bundling as found for the wildtype  
32 protein (Fig. 1E;  $p = 9.6E-06$ ; Table S1). Accordingly, and in agreement with previous  
33 observations<sup>19</sup>, tetramerization of ZapA is essential for its function.

1 Next, we were interested in how varying concentrations of wild-type ZapA affects the FtsZ filament  
2 pattern (Fig. 1F and Fig. S1E,F). Up to a concentration of ZapA = 0.75  $\mu\text{M}$ , the observed steady-  
3 state bundle width was below 0.7  $\mu\text{m}$  and did not change significantly. However, we observed a  
4 rapid shift to structures thicker than 0.75  $\mu\text{m}$  at ZapA concentrations higher than 1.5  $\mu\text{M}$ . This  
5 value peaked at ZapA = 1.5  $\mu\text{M}$  before it slightly decreased, suggesting a saturation of the system.  
6 By fitting a Hill equation to the corresponding data, we found that the behavior of ZapA was highly  
7 cooperative with a Hill coefficient of  $n_H = 4.12 \pm 6.84$  and a half maximal effective concentration  
8 of  $EC_{50} = 0.69 \pm 0.31 \mu\text{M}$ . To summarize, we found that ZapA is able to increase the apparent  
9 width of FtsZ filament bundles on the membrane in a cooperative manner.

### 10 **ZapA changes the large-scale architecture of FtsZ filament networks**

11 Bundling of FtsZ filaments does not fully characterize the influence of ZapA, as we also observed  
12 a dramatic shift in the overall architecture of the filament network. For example, without ZapA, the  
13 filament bundles were highly curved, often forming ring-like structures on the membrane. In  
14 contrast, the presence of ZapA gave rise to a pattern of straighter filament bundles, where ring-  
15 like structures were missing. To better characterize the biochemical activity of ZapA and its  
16 influence on FtsZ filament organization, we established a method to obtain a mathematical  
17 representation of the filament network (Fig. 2A). Our approach is based on the computation of  
18 structure tensors, where each pixel of the image is replaced by a unitary gradient vector describing  
19 the average orientation of the local gray scale (methods for details). By applying this method to  
20 our time-lapse movies, we obtained an orientation field for every time point of our experiments.  
21 The orientation field could then be further analyzed to calculate two independent parameters: the  
22 curvature,  $\kappa$  ( $\mu\text{m}^{-1}$ ) (Fig. 2B-D) and mean correlation length,  $\rho$  ( $\mu\text{m}$ ) (Fig. 2E-F) of the system.

23 From the orientation field in each frame, we obtained a heatmap describing the magnitude of the  
24 local curvature at each x and y coordinate (Fig. 2B and Fig. S2A). The mean absolute curvature  
25 of the filament network at each time point,  $\kappa(t)$ , was then given by fitting an exponential decay to  
26 the curvature distribution (Fig. 2C and Fig. S2A). In the absence of ZapA, FtsZ filaments showed  
27 a constant mean absolute curvature of  $\kappa_{ss} = 0.39 \pm 0.02 \mu\text{m}^{-1}$  (Fig. 2C, blue,  $n = 9$ ). In contrast, in  
28 the presence of 6  $\mu\text{M}$  ZapA,  $\kappa(t)$  decreased over time by about 20% with a plateau at  $\kappa_{ss} = 0.29$   
29  $\pm 0.03 \mu\text{m}^{-1}$  (Fig. 2C, red,  $n=13$ ), confirming that the presence of ZapA results in straighter bundles  
30 of FtsZ on the membrane.

31 Next, we used the orientation field to calculate the spatial order of the filament network, which is  
32 a measure for how the orientation of the filaments co-vary with one another across the observed  
33 membrane area. Specifically, we used the correlation function  $S(r)$  to calculate the distance range

1  $r$  over which the orientation angles in each frame share a common direction (methods for details).  
2 At a given time,  $S(r)$  showed a decreasing correlation of alignment with increasing distance (Fig.  
3 2E). In the absence of ZapA, the correlation curves obtained for different time points overlapped  
4 with each other (Fig. 2E, left; black to blue gradient), showing that spatial order stayed constant  
5 during the experiment. The presence of ZapA increases the correlation length, an effect that  
6 becomes more pronounced with time, indicating that ZapA increases the spatial order of the  
7 system (Fig. 2E, right; black to red gradient). We quantified this time-dependent increase in spatial  
8 order by comparing the characteristic correlation length,  $\rho(t)$ , which corresponds to the distance  
9 at which  $S(r) = 0.5$  (Fig. 2E insets and Fig. 2F). We found that the presence of ZapA led to a  
10 continuous increase in spatial order from  $\rho_t = 0.97 \pm 0.06 \mu\text{m}$  to  $\rho_{ss} = 1.74 \pm 0.21 \mu\text{m}$  at steady  
11 state (Fig. 2F, red,  $n = 8$ ), while  $\rho$  stayed constant in its absence (Fig. 2F, blue,  $n = 6$ ).

12 Next, we measured how increasing concentrations of ZapA affects the curvature and correlation  
13 length at steady state,  $\kappa_{ss}$  and  $\rho_{ss}$  (Fig. 2G, Fig. S2B,C). Similar as for the bundle width (Fig. 1F),  
14 we found a switch-like transition between two states with Hill coefficients of  $n_H = 4.63 \pm 0.84$  and  
15  $n_H = 4.68 \pm 2.84$  and with  $EC_{50} = 0.84 \pm 0.05$  and  $EC_{50} = 0.84 \pm 0.17$  for  $\kappa_{ss}$  and  $\rho_{ss}$ , respectively.  
16 Furthermore, neither ZapA R46A nor I83E had the same effect on the FtsZ filament network (Fig.  
17 2H,I; Table S1). These results show that the system exists in two states: a state of high curvature  
18 and low spatial order, at ZapA concentrations below  $0.8 \mu\text{M}$ , and a state of high spatial order and  
19 low curvature at higher concentrations.

## 20 **ZapA increases persistence of the membrane-bound FtsZ filament network**

21 Z-rings in cells lacking ZapA not only show loose arrangement, but are also highly dynamic,  
22 transitioning back and forth between multiple locations in the cell<sup>20</sup>. In contrast, the Z-ring in  
23 wildtype cells usually persists at the same position during the cell cycle. Consistent with these  
24 observations, we realized that FtsZ filament bundles continuously reorganized in the absence of  
25 ZapA, but appeared much more static when ZapA was present. To quantify the degree of  
26 reorganization, we performed temporal autocorrelation analysis. This method measures the  
27 similarity of fluorescence images as a function of a time lag  $\Delta t$  between different frames (Fig. 3A).  
28 We found that the corresponding autocorrelation function,  $\theta(\Delta t)$ , rapidly decayed in the absence  
29 of ZapA, consistent with a rapidly rearranging pattern (Fig. 3B, blue curve). In the presence of  
30  $6 \mu\text{M}$  of ZapA, however, this decay was about 4-fold slower (Fig. 3B, red curve). We defined the  
31 characteristic correlation time,  $\tau$ , for varying concentrations of ZapA by the half-time of a mono-  
32 exponential fit to the correlation curves. Similar to bundle width, curvature and correlation length,  
33  $\tau$  displayed a two-state behavior: below a critical concentration of ZapA the pattern showed fast

1 reorganization and consequently short correlation times, but the system switched to slow  
2 reorganization and long correlation times at saturating ZapA concentrations with a Hill coefficient  
3 of  $4.89 \pm 5.13$  and  $EC_{50} = 0.79 \pm 0.21 \mu\text{M}$  (Fig. 3C). ZapA R46A, which does not bind to FtsZ, did  
4 not affect reorganization dynamics (Fig. 3D;  $p = 0.42$ ), while ZapA I83E increased slightly, but  
5 not-significantly the correlation time (Fig. 3D;  $p = 0.08$ ). This shows that tetrameric ZapA not only  
6 affects the architecture of the membrane-bound filament network, but also its reorganization  
7 dynamics in a highly cooperative manner.

8 Together, our *in vitro* experiments and quantitative image analysis show that ZapA promotes an  
9 ultrasensitive switch in filament architecture and reorganization dynamics. In all instances, this  
10 switch happens at ZapA concentrations around  $0.75 \mu\text{M}$ , before the system saturates at ZapA  
11 concentrations similar to FtsZ. Interestingly, this correlation is consistent with ZapA tetramers  
12 having four FtsZ binding sites.

### 13 **ZapA does not change FtsZ polymerization dynamics**

14 So far, our analysis revealed that ZapA strongly increases the spatial order of the membrane-  
15 bound FtsZ filament network, and slows down reorganization dynamics. This apparent increase  
16 in filament stability, however, could perturb the spatiotemporal dynamics of cell wall synthases *in*  
17 *vivo*, as their motion is driven by treadmilling. Knocking out individual Zap proteins *in vivo* did not  
18 show any significant change in the FtsZ treadmilling velocity<sup>5</sup>. However, due to their overlapping  
19 functions, it is difficult to rule out a possible compensation by other FtsZ associated proteins in  
20 these mutants. Accordingly, we wondered if FtsZ crosslinking by ZapA influences the  
21 polymerization dynamics of membrane-bound filaments. To quantify the treadmilling velocity in  
22 the absence and presence of ZapA, we first constructed differential time-lapse movies, where we  
23 calculated the intensity differences between frames separated by a constant time delay (Fig. 4A  
24 and Fig. S3; Movie S2). This step yielded new time-lapse movies of moving speckles that  
25 represent either the growth or shrinkage of filament bundles in a given time (methods for details).

26 First, as ZapA was suggested to promote an antiparallel alignment of FtsZ filaments, we were  
27 interested if the presence of ZapA leads to a change of filament orientation<sup>12</sup>. Comparing the  
28 speckles between experiments with and without ZapA, we did not observe any significant  
29 difference, neither in shape nor intensity (Fig. S3A). This shows that the orientation of filaments  
30 in ZapA-induced bundles was similar as in bundles formed due to intrinsic lateral interactions  
31 between FtsZ filaments. Furthermore, we observed that fluorescent speckles corresponding to  
32 growth and shrinkage along the bundle roughly co-localized, and moved in a common direction  
33 with similar velocity (Fig. 4B,C). This observation is consistent with a polar orientation of FtsZ

1 filaments on the membrane and indicates that the mean filament length is shorter than the  
2 resolution of our fluorescence microscope (Fig. S3B).

3 Importantly, as these speckles can be automatically detected by particle tracking methods,  
4 differential imaging allows us to quantify the growth ( $\nu_+$ ) and shrinkage velocities ( $\nu_-$ ), of thousands  
5 of treadmilling trajectories simultaneously (methods for details). Using this approach, we found  $\nu_+$   
6 and  $\nu_-$  to be normally distributed with similar mean values consistent with treadmilling behavior  
7 ( $\nu_+ = 62.5 \pm 4.5$  nm/s,  $n = 4232$  tracks, 10 samples;  $\nu_- = 51.84 \pm 5.9$  nm/s,  $n = 6302$  tracks, 10  
8 samples) (Fig. 4D,E, blue). These values were unaffected in the presence of excess ZapA (6.0  
9  $\mu\text{M}$ ,  $\nu_+ = 58.8 \pm 3.3$  nm/s and  $\nu_- = 54.3 \pm 3.5$  nm/s) (Fig. 4D,E, red) and at all other ZapA  
10 concentrations tested in our experiments (Fig. 4F,G).

11 The velocity autocorrelation along each treadmilling trajectory provides information about the local  
12 directional persistence of treadmilling (Fig.4H; methods for details). At short times the velocity  
13 correlation in the absence of ZapA is always positive, consistent with persistent treadmilling  
14 filaments. However, we found that in the presence of excess concentrations of ZapA (Fig.4H, red)  
15 the velocity remained correlated for a longer time, consistent with straighter treadmilling tracks  
16 (Fig.4H, blue). Again, neither 6.0  $\mu\text{M}$  ZapA I83E nor ZapA R46A showed an effect on the  
17 directional persistence of FtsZ treadmilling (Fig. 4I;  $p = 0.45$  and  $p = 0.76$ , respectively; Table S1).

18 Together, these experiments and analyses show that despite its strong effect on the architecture  
19 and reorganization dynamics of the FtsZ filament network, ZapA does not slow down or enhance  
20 the underlying polymerization dynamics.

### 21 **ZapA binds FtsZ only transiently**

22 Next, we sought to better understand how ZapA could change the architecture of FtsZ filaments  
23 without slowing down their treadmilling dynamics. To this end, we prepared fluorescently labeled  
24 ZapA and imaged its behavior simultaneously with FtsZ. We found that ZapA co-localized with  
25 FtsZ bundles on the membrane, however with a more discontinuous appearance (Fig. 5A; Movie  
26 S3) suggesting highly dynamic, transient binding of ZapA to the filaments.

27 We then analyzed the turnover rate of FtsZ and ZapA using fluorescence recovery after  
28 photobleaching (FRAP) experiments (Fig. 5B; Movie S4). For FtsZ, we found a mean recovery  
29 half-time of  $7.63 \pm 1.30$  s ( $n = 6$ ) in the absence of ZapA and  $6.66 \pm 0.64$  s ( $n = 7$ ) at 6.0  $\mu\text{M}$  ZapA,  
30 consistent with our observation that treadmilling was unchanged (Fig. 5C;  $p = 0.47$ ). In contrast,  
31 ZapA itself showed a faster turnover with a recovery half-time of only  $3.01 \pm 0.47$  s ( $n = 6$ ). This  
32 difference in turnover is similar to the one found in living cells<sup>8</sup>.



1 To further corroborate these results, we performed single molecule experiments, where we added  
2 small amounts of a Cy5-labelled protein, either ZapA or FtsZ, to a background of Alexa488-  
3 labelled FtsZ (Fig. 5D; Movie S5). This not only allowed us to analyze the lifetime of FtsZ  
4 monomers in the treadmilling filaments, but also the recruitment of ZapA from solution. In  
5 agreement with our FRAP experiments, we found no difference in the lifetimes of FtsZ with and  
6 without ZapA (FtsZ,  $6.59 \pm 0.28$  s,  $n = 5$ ; FtsZ + ZapA,  $n = 6.01 \pm 1.24$  s,  $n=6$ ;  $p = 0.14$ ) (Fig. 5E,  
7 blue and red, respectively). Again, ZapA showed a faster turnover compared to FtsZ ( $0.94 \pm 0.14$   
8 s,  $n = 5$ ; Fig. 5D, purple;  $p = 1.44E-04$ ; Table S1). Together with the treadmilling velocity, we can  
9 now provide an estimate of the mean length of filaments, which is given as the product of lifetime  
10 with the treadmilling velocity. We found an FtsZ filament length between  $341.6 \pm 50.0$  and  $412.0$   
11  $\pm 37.7$  nm, when only FtsA was present, and between  $302.4 \pm 72.9$  and  $351.8 \pm 76.2$  nm in the  
12 presence of ZapA, showing that ZapA does not change the filament length. These values  
13 obtained in our *in vitro* experiments are about three times longer than what has been suggested  
14 for filaments *in vivo*<sup>21</sup>.

15 These results show that despite its strong influence on their organization, ZapA binds only  
16 transiently to FtsZ filaments. We believe that the difference in residence times of FtsZ and ZapA  
17 can explain how ZapA can increase the persistence and order of FtsZ filaments without  
18 compromising the treadmilling dynamics.

19

## 1 **Discussion**

2 FtsZ has long been known as the main organizer of bacterial cell division. Recent studies have  
3 shown that FtsZ plays two roles: First, its polymerization into the Z-ring defines the location of  
4 division in the cell. Second, FtsZ treadmilling was found to drive a circumferential motion of  
5 peptidoglycan synthases, which is required for the homogeneous distribution of cell wall synthesis  
6 at the division site. Given the importance of FtsZ polymerization dynamics for cytokinesis, the  
7 question arises how the robustness and precision of cell division is achieved, while FtsZ filaments  
8 are continuously turning over. FtsZ-associated proteins were known to contribute to the stability  
9 of the Z-ring and consequently that of the cell division machinery, the underlying mechanism  
10 however was not clear.

11 In this study, we show that ZapA aligns membrane-bound FtsZ filaments in a polar, parallel  
12 orientation. This results in a straightening and stabilization of filament bundles, and consequently  
13 an increase in the spatial order and spatiotemporal persistence of the filament network.  
14 Importantly, ZapA did not change the treadmilling velocity of FtsZ filaments (see Table 1 for a  
15 summary of results). Together, these observations lead us to conclude that ZapA is able to  
16 increase the precision and robustness of the Z-ring, without compromising the function of the cell  
17 division machinery (Fig. 6).

18 Furthermore, we found that ZapA promotes a switch-like transition between a state of low order  
19 and fast reorganization dynamics to a state of high order and slow reorganization. What could be  
20 the reason for the observed cooperativity? Due to its central four-helix bundle, the ZapA tetramer  
21 can be assumed to have a rigid structure, which promotes the formation of straight filament  
22 bundles as observed in previous studies<sup>13</sup>. Furthermore, we expect the ZapA tetramer to bind  
23 with a higher affinity to filaments aligned in parallel, where all binding sites are in contact with  
24 FtsZ. Accordingly, binding to and aligning filaments can increase the affinity of ZapA towards FtsZ  
25 and therefore stimulate its own recruitment (Fig. 6).

26 Our experiments show that FtsZ, FtsA and ZapA self-organize into a highly ordered cytoskeletal  
27 structure. How does this system compare to filament networks of other cytoskeletal proteins?  
28 Similar to gels of actin filaments and molecular motors, the structures described here exist out of  
29 equilibrium. In contrast to these active gels, however, the FtsZ filament network is driven out of  
30 equilibrium due to the continuous consumption of energy during treadmilling and not by the activity  
31 of motor proteins. Furthermore, the function of actin bundling proteins is to modulate the  
32 architecture and mechanical properties of actin filament networks, which can also affect actin

1 polymerization dynamics<sup>22</sup>. In contrast, polymerization and depolymerization rates of FtsZ stay  
2 constant even at saturating concentrations of ZapA. Accordingly, we believe that the cytoskeletal  
3 networks of FtsZ, FtsA and ZapA represent a novel and distinct form of active biological material  
4 despite the apparent absence of mechanical stresses that are usually present in gels composed  
5 of filaments and molecular motors<sup>23–25</sup>.

6

## 7 **Acknowledgements**

8 We thank all Loose lab members for support and useful discussions, to the life sciences facility  
9 (LSF) and the bioimaging facility (BIF) of IST Austria for assistance with general equipment and  
10 TIRF microscopy, respectively, and to Georgia Squyres (Harvard University) for critical revision  
11 of results and manuscript before publication; This work was supported by a European Research  
12 Council (ERC) grant awarded to Martin Loose (ERC-2015-StG-679239) and a Boehringer  
13 Ingelheim Fonds (BIF) PhD fellowship awarded to Paulo Caldas.

## 14 **Author contributions**

15 **Project Management:** M.L; **Conceptualization & Design:** M.L and P.C; **Experimental Data**  
16 **Collection:** P.C and M.L; **Curvature Analysis:** N.B and P.C.; **Spatial Order Analysis:** D.P, M.L  
17 and P.C; **Treadmilling speed and further image analysis:** M.L, P.C and J.B; **Data**  
18 **interpretation:** M.L, J.B and P.C; **Data Visualization:** P.C; **Manuscript Drafting:** M.L and P.C;  
19 **Critical Revision of the Manuscript:** All authors; Final version was read by all authors and  
20 approved to be published.

## 21 **Competing interests**

22 The authors declare no competing interests.

## 1 **Material and Methods**

### 2 **Reagents and Chemicals**

3 Phospholipids used in this paper, DOPC (1,2-dioleoyl-sn-glycero-3-phosphocholine) and DOPG  
4 (1,2-dioleoyl-snglycero-3-phospho-(1'-racglycerol)), were purchased from Avanti Polar Lipids  
5 (Alabaster, AL) and kept at -20°C as 25mg/ml stock solutions in chloroform; Sulfo-Cyanine-5-  
6 maleimide (Cy5) was acquired from Lumiprobe and Alexa Fluor® 488 C5-Maleimide (Alexa488)  
7 was acquired from ThermoFisher Scientific; Nucleotides were acquired from ThermoFisher  
8 Scientific or Jena Bioscience; Precision cover glasses for the homebuilt chambers were obtained  
9 from VWR (thickness No. 1.5H, 24 x 50); *E.coli* strains were obtained from Lucigen; Strep-Tactin  
10 resin was acquired from Iba Lifesciences and Nickel resins were purchased from ThermoFisher  
11 Scientific (HisPur™ Ni-NTA resin) or Macherey-Nagel (Protino Ni-TED resin); All the remaining  
12 reactants and salts were obtained from Sigma, Merck, or Invitrogen and were of analytic or  
13 spectroscopic grade.

### 14 **Protein Biochemistry**

#### 15 Purification and labelling of FtsZ

16 FtsZ (UP P0A9A6) was cloned into a pTB146-derived vector which attached a N-terminal His<sub>6</sub>-  
17 SUMO tag plus seven additional amino acids (AEGCGEL) that provide a cysteine residue for  
18 further fluorescent labelling (pML45, His<sub>6</sub>-SUMO-GCG-FtsZ). *E.coli* C41 (DE3) cells were  
19 transformed with pML45 and grown in TB medium supplemented with ampicillin at 37°C, until  
20 cells reached an OD<sub>600</sub> of 0.8. After the addition of IPTG to a final concentration of 1mM, cells  
21 grew for 5h at 37°C. Cells were harvested by centrifugation, pellets were frozen in liquid nitrogen  
22 and kept at -80°C until further use.

23 For purification, pellets were thawed and resuspended in FtsZ buffer (50 mM Tris-HCl pH 8.0,  
24 500mM KCl, 2mM β-mercaptoethanol, 10% glycerol) supplemented with 20mM imidazole and  
25 cComplete EDTA-free protease inhibitors cocktail (1tablet/50ml, Roche)) followed by incubation at  
26 4°C for 15 min. Cells were lysed using a cell disruptor (Constant Systems) at a pressure 1.36kbar  
27 and incubated with 1mg/ml DNase I (Sigma-Aldrich) and 2.5mM MgCl<sub>2</sub> for 15min. The lysate was  
28 then centrifuged (30 min, 60,000xg, 4°C) and the supernatant was incubated with nickel agarose  
29 resin (HisPur Ni-NTA resin, Thermo Scientific) for 60 min at 4°C. The resin was extensively  
30 washed with FtsZ buffer supplemented with 20mM imidazole and 30mM imidazole. The fusion  
31 protein was eluted with FtsZ buffer supplemented with 250 mM imidazole. Fractions were

1 evaluated by SDS-PAGE (stained with Coomassie Blue) and peak fractions containing His<sub>6</sub>-  
2 SUMO-GCG-FtsZ were pooled and incubated with His<sub>6</sub>-tagged SUMO protease (His<sub>6</sub>-Ulp1)  
3 during an overnight dialysis into FtsZ cleavage buffer (50mM Tris-HCl pH 8.0, 300mM KCl and  
4 10% glycerol). The digested sample was passed several times through Ni-NTA resin, to remove  
5 His<sub>6</sub> containing molecules. The flow through was collected and active protein was enriched by  
6 sedimentation of FtsZ filaments. For this, the protein was dialyzed into FtsZ polymerization buffer  
7 (50 mM PIPES pH 6.7, 10 mM MgCl<sub>2</sub>) and incubated with CaCl<sub>2</sub> and GTP for 15 min at 30°C. The  
8 solution was then centrifuged (2 min, 20,000xg, RT) and a clear gel-like pellet containing  
9 polymeric FtsZ was obtained. The pellet was resuspended into FtsZ storage buffer (50mM Tris-  
10 HCl pH 7.4, 50mM KCl, 1mM EDTA and 10% glycerol) and incubated with 100×molar excess of  
11 7 Tris(2-carboxyethyl)phosphine hydrochloride (TCEP) for 20 min at RT for cysteine-labelling.  
12 Five times molar excess of a thiol-reactive dye (Alexa488 or Cy5–maleimide) was added to the  
13 solution and incubated overnight at 4°C during dialysis into FtsZ storage buffer. Finally, labelled  
14 FtsZ was loaded on a PD10 desalting column to remove CaCl<sub>2</sub>, GTP and free dye. Purified FtsZ  
15 was aliquoted, flash frozen in liquid nitrogen and kept at -80°C until usage.

## 16 Purification of FtsA

17 The gene coding for FtsA (UP P0ABH0) was cloned into a modified pTB146 vector. The resulting  
18 vector, pML60, encodes for FtsA with an N-terminal His<sub>6</sub>-SUMO-pentaglycine tag. *E.coli* C41  
19 (DE3) cells were transformed with pML60 and grown in 2xYT medium supplemented with  
20 ampicillin, at 37°C, until they reached an OD600 of 0.6-0.8. After the addition of IPTG to a final  
21 concentration of 1mM, cells grew overnight at 18°C. Cells were harvested by centrifugation,  
22 pellets were frozen in liquid nitrogen and kept at -80°C until further use.

23 For purification, cells were thawed and resuspended in FtsA buffer (50 mM Tris-HCl pH 8.0,  
24 500mM KCl, 10mM MgCl<sub>2</sub>) supplemented with 1 mg/ml lysozyme, cOmplete EDTA-free protease  
25 inhibitors cocktail (1 tablet/50ml, Roche), 1 mg/ml DNase (Sigma-Aldrich) and 0.5mM DTT. Cells  
26 were then lysed using a cell disruptor (Constant Systems) at a pressure of 1.36kbar, centrifuged  
27 (60,000xg, 45min at 4°C) and the supernatant was incubated with Nickel agarose beads (Protino  
28 Ni-TED, Macherey-Nagel) for 1h at 4°C.

29 The resin was extensively washed with FtsA buffer and FtsA buffer supplemented with 5mM  
30 imidazole. The fusion protein was then eluted with FtsA buffer supplemented with 250mM  
31 imidazole and fractions were evaluated by SDS-PAGE (stained with Coomassie Blue). Peak  
32 fractions containing His-SUMO-GGGGG-FtsA were pooled and the buffer was exchanged into

1 FtsA storage buffer (50 mM Tris-HCl pH 8.0, 500 mM KCl, 10 mM MgCl<sub>2</sub>, 0.5 mM DTT, 20%  
2 glycerol). The His<sub>6</sub>-SUMO tag was cleaved by incubating His-SUMO-GGGGG-FtsA with His<sub>6</sub>-  
3 Ulp1 for 90min at 30°C. The sample was then passed several times through Protino Ni-TED resin,  
4 previously equilibrated with FtsA storage buffer, to remove His<sub>6</sub>-containing molecules. Protein  
5 was aliquoted, flash frozen in liquid nitrogen and kept at -80°C until usage.

#### 6 Purification of ZapA and Mutants

7 ZapA (UP P0ADS2) was cloned into a modified pTB146 vector which attached an N-terminal  
8 Twinstrep-SUMO tag (pML130, Twinstrep-SUMO-ZapA). *E.coli* BL21 (DE3) cells were  
9 transformed with pML130 and grown in TB medium supplemented with ampicillin, at 37°C, until  
10 cells reached an OD600 of 0.6-0.8. After the addition of IPTG to a final concentration of 1 mM,  
11 cells grew for 4h at 37°C. Cultures were harvested, and pellets were frozen in liquid nitrogen and  
12 kept at -80°C until further use.

13 For purification, cells were thawed and incubated with ZapA buffer (50 mM HEPES pH 7.5,  
14 300mM KCl, 10% glycerol) supplemented with 2mM β-mercaptoethanol and cComplete EDTA-free  
15 protease inhibitor tablets (1tablet/50mL, Roche Diagnostics) for 15min at 4°C. Cells were then  
16 lysed using a cell disruptor and incubated in the presence of 1mg/ml of DNase (Sigma-Aldrich)  
17 and 2.5mM MgCl<sub>2</sub> for 15min. The lysate was centrifuged (30 min, 60,000xg, 4°C) and the  
18 supernatant was incubated with strep-tactin resin (Strep-Tactin® resin, Iba Lifesciences) for  
19 30min at 4°C. Beads were extensively washed with ZapA buffer and the fusion protein was eluted  
20 using ZapA buffer supplemented with 50mM biotin. Peak fractions of Twinstrep-SUMO-ZapA  
21 were identified by SDS-PAGE (stained with Coomassie Blue) and pooled. The Twinstrep-SUMO  
22 tag was cleaved with His<sub>6</sub>-Ulp1 during an overnight dialysis into ZapA storage buffer (50mM Tris-  
23 HCl pH 7.5, 50 mM KCl, 10% Glycerol). The solution was then passed through Ni-NTA and strep-  
24 tactin resins to remove His<sub>6</sub>-Ulp1 and free twinstrep-SUMO tag, respectively. ZapA was aliquoted,  
25 flash frozen in liquid nitrogen and kept at -80°C until usage.

26 For labeling purposes, ZapA was additionally cloned into a vector which attached 5 residues  
27 (LPETG) to the C-terminus of the protein, pMAR11b (TwinStrepSUMO-ZapA-LPETG). ZapA-  
28 LPETG was expressed and purified as the wildtype protein followed by sortase-mediated labelling  
29 <sup>26</sup>. Specifically, ZapA-LPETG was incubated with 0.5 mM of labelled peptide GGGC-Cy5 and  
30 10μM Sortase 7M (purified using pET30b-7M SrtA, a gift from Hidde Ploegh, Addgene plasmid  
31 #51141) in a final concentration of 50 μM. The reaction was carried during an overnight dialysis  
32 into ZapA storage buffer at 4°C. Sample was further purified from free labelled peptide and

1 Sortase by size-exclusion chromatography using a Hi/Load 16/600 Superdex 75 column (GE  
2 Healthcare) previously equilibrated with ZapA storage buffer. Labelled ZapA was collected,  
3 aliquoted and flash frozen in liquid nitrogen. ZapA mutants, R46A and I83E, were obtained by  
4 site-directed mutagenesis (pMAR9 and pMAR10b, respectively) and purified following the same  
5 procedure as the wild type protein.

## 6 **Self-organization assay and Imaging**

### 7 Preparation of small unilamellar vesicles (SUVs)

8 DOPC and DOPG dissolved in chloroform were transferred into a glass vial to a final concentration  
9 of 5 mM (70:30 molarity ratio). Using a stream of nitrogen, the mixture was dried to form a thin  
10 film of lipids and transferred to a vacuum desiccator for 3h to completely remove any residual  
11 chloroform. The lipids were then rehydrated in Supported Lipid Bilayer (SLB) buffer (50mM Tris-  
12 HCl pH 7.5, 300mM KCl) and incubated at 37°C for 30 min. The lipid film was then completely  
13 resuspended by vortexing vigorously to obtain multilamellar vesicles of different sizes and frozen  
14 using liquid nitrogen. To obtain small unilamellar vesicles (SUVs), the suspension was first  
15 subjected to five freeze-thaw cycles followed by tip sonication. Vesicles were kept at -20°C in  
16 small aliquots of 30µl up to two months.

### 17 Preparation of self-made reaction chamber

18 Glass coverslips were cleaned by sonicating in 2% Hellmanex II solution (Hellma) for at least 15  
19 min, followed by extensive washing and sonication in milliQ H<sub>2</sub>O before storage in 95% reagent-  
20 grade ethanol for up to one week. Before use, glass coverslips were blown dry with compressed  
21 air and cleaned in an air plasma for 15 min. The reaction chamber was prepared by attaching a  
22 plastic ring (top of Eppendorf tube) on a cleaned glass coverslip using ultraviolet glue (Norland  
23 optical adhesive 88).

### 24 Preparation of supported lipid bilayer (SLB)

25 To form a supported lipid bilayer, a SUV suspension was diluted to 1mM in SLB buffer (50mM  
26 Tris-HCl pH 7.5, 300mM KCl) and CaCl<sub>2</sub> was added to a final concentration of 2mM. From this  
27 mix, 50 µl were added to each self-made reaction chamber. Vesicles adsorb to the surface,  
28 rupture and fuse with the clean hydrophilic glass to form a flat bilayer, which is further facilitated  
29 by the presence of CaCl<sub>2</sub>. After 1h of incubation at room temperature, 50 µl of SLB buffer was  
30 added to each chamber (for a final volume of 100µl) and sample was rinsed several times with  
31 200 µL of reaction buffer (50mM Tris-HCl pH 7.5, 150mM KCl, 5mM MgCl<sub>2</sub>).

1 For the self-organization assay, all experiments were performed by first adding an oxygen  
2 scavenger system to the reaction chamber (0.2% d-Glucose, 0.016 mg/ml glucose oxidase,  
3 0.002mg/ml catalase, 1mM dithiothreitol and 0.25mg/mL trolox) to prevent photobleaching. Then,  
4 FtsZ (with 30% Cy5- or Alexa488-labeled protein) and FtsA were added to the reaction chamber  
5 in a final concentration of 1.5  $\mu$ M and 0.5  $\mu$ M, respectively. To trigger polymerization and  
6 membrane recruitment of FtsZ, ATP and GTP were added to the system to a final concentration  
7 of 4 mM. ZapA was added in different concentration ranges before the addition of GTP.

#### 8 Total internal reflection fluorescence microscopy (TIRFM)

9 All experiments were performed on an Inverted multipoint total internal reflection fluorescence  
10 (TIRF) microscope (TILL Photonics) equipped with dual camera TIRF objectives (Andor  
11 897straight (X-8449) 512x512 pixel and Andor 897 (X-8533) 512x512 pixel) and an image splitter  
12 (Andor Tucam) equipped with a long pass of 580 and 640nm. Alexa488 and Cy5 dyes were  
13 excited using 488nm and 642nm laser lines, respectively, and the emitted light was filtered by an  
14 Andromeda quad-band bandpass filter. Images were typically obtained every 2s, with 50ms  
15 exposure to minimize photobleaching and using a 100x Olympus TIRF (NA = 1.49 DIC) objective.

#### 16 **Image analysis and processing**

17 For image processing, image stacks were imported using FIJI software<sup>27</sup>. For image analysis and  
18 for visualization (supplemental movies) acquired time-lapse movies were usually first normalized  
19 to create a constant overall intensity and compensate for the increasing intensity over time due  
20 to protein binding to the membrane.

#### 21 Quantification of Bundle Width

22 To estimate the width of membrane-bound FtsZ bundles, fluorescence images were binarized  
23 using the adaptive threshold plugin for ImageJ. This plugin corrects for non-homogeneous  
24 background intensities, overcoming the limitation of conventional threshold methods. The  
25 background was removed using a local threshold corresponding to the mean intensity of an area  
26 of 20x20 pixels without any further subtraction. The binarized time lapse movie was then  
27 processed with the despeckle filter in ImageJ to remove small particles. Next, we calculated the  
28 Euclidean Distance Map (EDM) of every frame using the Distance Mapping function of ImageJ.  
29 This transformation results in a grey scale image, where the grey value of each pixel represents  
30 the shortest distance to the nearest pixel in the background. Accordingly, bundle widths  
31 correspond to the local peak intensities multiplied by 2.



1 The mean bundle width for every frame of the movie was calculated by identifying the peak  
2 intensities for each line and column of the image using a MATLAB script. This value could then  
3 be plotted as a function of time. The characteristic bundle width for different concentrations of  
4 ZapA and respective mutants was obtained by taking the time-average at steady state.

## 5 Architecture analysis

6 For a quantitative description of the filament architecture, we first calculated an orientation field  
7 of the pattern by calculating a gradient squared tensor at every position of a fluorescence  
8 micrograph<sup>28,29</sup>. This analysis was performed either using the OrientationJ plugin for ImageJ or  
9 using a custom python code based on the *scikit-image* package (Fig. 2A). For this method, a unit  
10 vector  $u_\theta = (\cos\theta, \sin\theta)$  is assigned to all pixels in the image and their directional derivative is  
11 measured:

$$12 \quad D_{u_\theta} f(x, y) = u_\theta^T \nabla f(x, y) = u_\theta^T \left[ \frac{\partial f(x, y)}{\partial x}, \frac{\partial f(x, y)}{\partial y} \right]$$

13 Where  $f(x, y)$  is the local grey value and  $\nabla f(x, y)$  its corresponding gradient in x and y. The  
14 algorithm then finds the direction  $u_\varphi$ , where the derivative is maximized over the region of interest  
15 (ROI):

$$16 \quad u_\varphi = \arg \max \|D_{u_\theta} f(x, y)\|_w^2, \quad \|u_\theta\| = 1$$

17 where  $w(x, y) \geq 0$  is related with the function that describes the ROI. Thus, the magnitude of  
18 each vector is proportional to the image contrast in a given direction and the average local  
19 direction is given by a weighted sum of all the vectors. A Gaussian filter, with a variance  $\sigma$ , governs  
20 the effective region of interest in which the orientation should be projected, i.e. the approximate  
21 dimension (in pixels) of the local structures in the image. A range of different  $\sigma$  was tested to find  
22 the best orientation field that could describe our data. This parameter was settled as 4 pixels for  
23 the analysis.

24 From a standard inner-product manipulation we get:

$$25 \quad \|D_{u_\theta} f(x, y)\|_w^2 = \langle u_\theta^T \nabla f(x, y), \nabla f(x, y)^T u_\theta \rangle_w = u_\theta^T \hat{P} u_\theta$$

26 Where the first eigenvector of the so-called structure tensor matrix,  $\hat{P} = \langle \nabla f(x, y), \nabla f(x, y)^T \rangle$ ,  
27 defines the local dominant orientation. The final output is a two-dimensional orientation field,  
28  $\varphi(x, y)$ , where each pixel has been replaced by unit vectors.

1 To estimate the curvature ( $k$ ) of the orientation field, we used the definition from ref. <sup>28</sup>, where it  
2 is described as the rate of change in the local orientation in the direction perpendicular to that  
3 orientation:

$$4 \quad k(x, y) = \frac{\partial \varphi(x, y)}{\partial c} = -\sin \varphi(x, y) \frac{\partial \varphi(x, y)}{\partial x} + \cos \varphi(x, y) \frac{\partial \varphi(x, y)}{\partial y}$$

5 Where  $c$  corresponds to the axis perpendicular to the orientation. From this, we generated a color  
6 map containing  $k [x_j y_i]$ , which represents the curvature in  $\varphi$  at position  $x, y$  (Fig. 2B). Different  
7 colors (red and blue) indicate which way the curves bend (left or right). This depends on the way  
8 we define the parameters, i.e. which way we walk along the curve. Accordingly, as the direction  
9 of curvature is not a relevant parameter in our analysis, we plotted the distribution of absolute  
10 values for every experiment (mirrored negative values). The mean curvature for each image  $\langle k \rangle$   
11 was given by the mean half time of the mono-exponential decay fitted to these distributions (Fig.  
12 2C).

13 To obtain a quantitative description of the spatial order of the filament network, we applied a  
14 nematic orientational correlation function,  $S(r)$ , to the angles in the orientation field. This function  
15 compares the relative orientation of each angle with all the surrounding angles separated by an  
16 increasing distance  $r$ :

$$17 \quad S(r) = \langle \cos (2(\varphi(r_{i,j}) - \varphi(r_i))) \rangle_{(|r_{i,j}-r_i|=r)}$$

18 Where  $\varphi(r_{i,j})$  is the orientation angle at the position  $r_{i,j}$  and  $\varphi(r_i)$  corresponds to all the  
19 surrounding angles at the position  $(r_i)$ , given that  $|r_{i,j} - r_i| = r$ . The angular brackets indicate an  
20 average over the indicated range and the presence of the '2' in the correlation function reflects  
21 the nematic symmetry of the system  $[-\pi/2, \pi/2]$ . As a result, we describe the average distance  
22 range over which the angles share a common orientation in each image. Each correlation curve  
23 typically goes from 1, where  $r$  is small and correlation is higher, to zero, where the correlation  
24 decreases drastically as the  $r$  increases. Accordingly, more ordered arrangements will display a  
25 higher spatial correlation at higher correlation lengths. To better visualize fluctuations in this  
26 parameter we identified a correlation length as  $r$  such that  $S(r) = 0.5$  (intersection) as a function  
27 of time.

28

## 1 Image Autocorrelation

2 To quantify the reorganization dynamics of the membrane-bound FtsZ filament network, we  
3 performed a temporal correlation analysis using the ImageCorrelationJ plugin for ImageJ<sup>30</sup>. This  
4 method calculates the Pearson cross-correlation coefficient (PCC) between two frames with an  
5 increasing time lag between them ( $\Delta t$ )<sup>31</sup>. The mean intensities in local areas of 3x3 pixels were  
6 used to calculate the PCC between two different images, which was then plotted as a function of  
7  $\Delta t$  (Fig.3B). For highly dynamic image pattern, the PCC typically decays rapidly with  $\Delta t$ , but slowly  
8 for persistent structures. The corresponding correlation curve was fitted to a mono-exponential  
9 decay, and the half-time (correlation time,  $\tau$ ) was used to compare a set of individual experiments.

## 10 Treadmilling Velocity Analysis

11 To quantify treadmilling dynamics, we have developed an automated image analysis based on  
12 differential image stack obtain from the ImageJ ImageCalculator command. First, two frames  
13 separated by 10s were subtracted from one another to generate a new time-lapse movie showing  
14 directionally moving fluorescent speckles. These speckles correspond to growth or shrinkage of  
15 filaments at a given position, (Fig. 4A and S3A). Next, the TrackMate<sup>32</sup>, a particle tracking toolbox  
16 available for ImageJ, was used to identify and track fluorescent speckles or filament treadmilling  
17 and to obtain detailed information regarding their displacement and velocity. Moving speckles  
18 were detected using the LoG (Laplacian Gaussian) detector with an estimated diameter of 1  $\mu\text{m}$ .  
19 We used TrackMate's quality criterion to select only the best 5% tracked particles and from these,  
20 we discarded particles with a signal-to-noise ration lower than 0.7. To build the final trajectories  
21 we used the "Simple LAP tracker" with a "Max Linking Distance" of 0.5 $\mu\text{m}$ , a "Maximal gap-closing  
22 distance" of 1 $\mu\text{m}$  and "Max frame Gap" of 2 frames, and we only considered for analysis  
23 trajectories longer than 6sec.

24 Reconstructed trajectories were further analyzed using a Matlab script based on @msdanalyzer<sup>33</sup>  
25 toolbox to obtain information regarding the velocity and directionality of the moving speckles. The  
26 mean velocities obtained from TrackMate followed a normal distribution and were fitted to a  
27 Gaussian function to extract the mean velocity at each condition (Fig.4). In addition, we calculated  
28 the autocorrelation of the velocity vectors, i.e, angles of the normalized displacement vectors were  
29 compared pairwise as a function of an increasing time interval ( $\Delta t$ ) and the correlation coefficient  
30 ( $V_{\text{corr}}$ ) was given by the cosine of the angle difference. This kind of analysis provided information  
31 about directionality since random motion particles tend to show velocity vectors completely

1 uncorrelated ( $V_{\text{corr}} = 0$  for all  $\Delta t$ ) while particles with a directed migration display highly correlated  
2 velocity vectors ( $V_{\text{corr}} >$  for all  $\Delta t$ ).

### 3 Single Molecule Tracking

4 Single molecule experiments were performed as described in ref. <sup>34</sup>. Briefly, individual FtsZ  
5 monomers were resolved at single molecule level by mixing small amounts of Cy5-labelled FtsZ  
6 (less than 2nM) to a background of 1.5  $\mu\text{M}$  Alexa488-labelled FtsZ. To track individual ZapA  
7 molecules, we followed a similar strategy by adding small amounts of ZapA-Cy5 to a background  
8 of unlabeled ZapA, always in the presence of Alexa488-FtsZ 1.5 $\mu\text{M}$ . Experiments were typically  
9 recorded using minimal laser power to visualize single molecules, with an exposure time of 50 ms  
10 and a varying acquisition time (114ms to 1s) for further photobleaching correction <sup>34</sup>. Single  
11 molecules were identified and tracked using the automated particle-tracking platform TrackMate  
12 (<https://imagej.net/TrackMate>), with the following parameters: a particle size of 0.5  $\mu\text{m}$ , particles  
13 localized for at least two frames were considered, linking max distance and gap closing distance  
14 of 0.5  $\mu\text{m}$ , and 2 frames for the gap closing max. The mean lifetime of single molecules was  
15 obtained by fitting a mono-exponential decay to the lifetime distribution.

### 16 Fluorescence recover after photo bleaching (FRAP)

17 For FRAP experiments, we allowed the system to reach the steady state and a small area of the  
18 membrane was bleached using a high laser intensity. To obtain the half-time of the recovery, a  
19 Jython macro script for ImageJ (Image Processing School 8 Pilsen 2009) was used to fit the  
20 fluorescence recovery to  $I(t) = a(1 - \exp(-bt))$ , where  $I(t)$  is the intensity value corrected for  
21 photobleached effects. FRAP experiments were acquired with an exposure time of 50msec and  
22 an acquisition time of one frame every 114msec.

### 23 Statistical analysis

24 For statistical analyses, two-tailed Student's  $t$ -tests were performed using a python script. A  $p$ -  
25 value of  $< 0.05$  was considered as statistically significant. For the boxplots, boxes are represented  
26 from 25th to 75th percentiles, the whiskers extend 1.5x the standard deviation and the mean value  
27 is plotted as a line in the middle of the box.

28

29

## 1 **References**

- 2 1. Bi, E. & Lutkenhaus, J. FtsZ ring structure associated with division in Escherichia coli. *Nature* **354**,  
3 161–164 (1991).
- 4 2. Pichoff, S. *et al.* Unique and overlapping roles for ZipA and FtsA in septal ring assembly in  
5 Escherichia coli. *EMBO J.* **21**, 685–693 (2002).
- 6 3. de Boer, P. A. J. Advances in understanding E. coli cell fission. *Curr. Opin. Microbiol.* **13**, 730–7  
7 (2010).
- 8 4. Soderstrom, B. *et al.* Disassembly of the divisome in Escherichia coli: Evidence that FtsZ  
9 dissociates before compartmentalization. *Mol. Microbiol.* **92**, 1–9 (2014).
- 10 5. Yang, X. *et al.* GTPase activity–coupled treadmilling of the bacterial tubulin FtsZ organizes septal  
11 cell wall synthesis. *Science* **355**, 744–747 (2017).
- 12 6. Bisson-Filho, A. W. *et al.* Treadmilling by FtsZ filaments drives peptidoglycan synthesis and  
13 bacterial cell division. *Science* **355**, 739–743 (2017).
- 14 7. Gueiros-Filho, F. J. & Losick, R. A widely conserved bacterial cell division protein that promotes  
15 assembly of the tubulin-like protein FtsZ. *Genes Dev.* **16**, 2544–2556 (2002).
- 16 8. Buss, J. *et al.* In vivo organization of the FtsZ-ring by ZapA and ZapB revealed by quantitative  
17 super-resolution microscopy. *Mol Microbiol* **89**, 1099–1120 (2013).
- 18 9. Hale, C. A. *et al.* Identification of Escherichia coli ZapC (YcbW) as a component of the division  
19 apparatus that binds and bundles FtsZ polymers. *J Bacteriol* **193**, 1393–1404 (2011).
- 20 10. Durand-Heredia, J., Rivkin, E., Fan, G., Morales, J. & Janakiraman, A. Identification of ZapD as a  
21 Cell Division Factor That Promotes the Assembly of FtsZ in Escherichia coli. *J. Bacteriol.* **194**,  
22 3189–3198 (2012).
- 23 11. Dajkovic, A., Pichoff, S., Lutkenhaus, J. & Wirtz, D. Cross-linking FtsZ polymers into coherent Z  
24 rings. *Mol Microbiol* **78**, 651–668 (2010).
- 25 12. Low, H. H., Moncrieffe, M. C. & Löwe, J. The crystal structure of ZapA and its modulation of FtsZ  
26 polymerisation. *J. Mol. Biol.* **341**, 839–852 (2004).
- 27 13. Mohammadi, T. *et al.* The GTPase activity of Escherichia coli FtsZ determines the magnitude of  
28 the FtsZ polymer bundling by ZapA in vitro. *Biochemistry* **48**, 11056–11066 (2009).
- 29 14. Roach, E. J., Kimber, M. S. & Khursigara, C. M. Crystal structure and site-directed mutational  
30 analysis reveals key residues involved in Escherichia coli ZapA function. *J Biol Chem* **289**, 23276–  
31 23286 (2014).
- 32 15. Small, E. *et al.* FtsZ Polymer-bundling by the Escherichia coli ZapA Orthologue, YgfE, Involves a  
33 Conformational Change in Bound GTP. *J. Mol. Biol.* **369**, 210–221 (2007).
- 34 16. Galli, E. & Gerdes, K. FtsZ-ZapA-ZapB interactome of Escherichia coli. *J Bacteriol* **194**, 292–302  
35 (2012).
- 36 17. Pacheco-Gómez, R. *et al.* Tetramerization of ZapA is required for FtsZ bundling. *Biochem J* **449**,  
37 795–802 (2013).
- 38 18. Loose, M. & Mitchison, T. J. The bacterial cell division proteins FtsA and FtsZ self-organize into  
39 dynamic cytoskeletal patterns. *Nat. Cell Biol.* **16**, 38–46 (2014).
- 40 19. Pacheco-Gómez, R. *et al.* Tetramerization of ZapA is required for FtsZ bundling. *Biochem. J.* **449**,  
41 795–802 (2013).
- 42 20. Buss, J. *et al.* In vivo organization of the FtsZ-ring by ZapA and ZapB revealed by quantitative  
43 super-resolution microscopy. *Mol. Microbiol.* **89**, 1099–1120 (2013).
- 44 21. Erickson, H. P., Anderson, D. E. & Osawa, M. FtsZ in Bacterial Cytokinesis: Cytoskeleton and

- 1 Force Generator All in One. *Microbiol. Mol. Biol. Rev.* (2010). doi:10.1128/MMBR.00021-10
- 2 22. Schmoller, K. M., Semmrich, C. & Bausch, A. R. Slow down of actin depolymerization by cross-  
3 linking molecules. *J. Struct. Biol.* **173**, 350–357 (2011).
- 4 23. Marchetti, M. C. *et al.* Hydrodynamics of soft active matter. *Rev. Mod. Phys.* (2013).  
5 doi:10.1103/RevModPhys.85.1143
- 6 24. Fletcher, D. A. & Geissler, P. L. Active Biological Materials. *Annu. Rev. Phys. Chem.* (2008).  
7 doi:10.1146/annurev.physchem.040808.090304
- 8 25. Prost, J., Jülicher, F. & Joanny, J.-F. Active gel physics. *Nat. Phys.* **11**, 111 (2015).
- 9 26. Theile, C. S. *et al.* Site-specific N-terminal labeling of proteins using sortase-mediated reactions.  
10 *Nat. Protoc.* **8**, 1800–7 (2013).
- 11 27. Schindelin, J. *et al.* Fiji: An open source platform for biological image analysis. *Nat. Methods* **9**,  
12 676–682 (2012).
- 13 28. van Ginkel, M., van de Weijer, J., van Vliet, L. J. & Verbeek, P. W. Curvature estimation from  
14 orientation fields. in *Proc. Scandinavian Conference on Image Analysis (SCIA)* 545–551 (1999).
- 15 29. Van Vliet, L. & Verbeek, P. Estimators for orientation and anisotropy in digitized images. *Proc.*  
16 *ASCI* 442–450 (1995).
- 17 30. Chinga. Quantification of paper mass distributions within local picking areas. *Nord. Pulp Pap. Res.*  
18 *J.* **22**, 441–446 (2007).
- 19 31. G. & Syverud, K. C. Quantification of paper mass distributions within local picking areas. *Nord.*  
20 *Pulp Pap. Res. J.* (2007). doi:10.3183/NPPRJ-2007-22-04-p441-446
- 21 32. Tinevez, J. Y. *et al.* TrackMate: An open and extensible platform for single-particle tracking.  
22 *Methods* **115**, 80–90 (2017).
- 23 33. Tarantino, N. *et al.* TNF and IL-1 exhibit distinct ubiquitin requirements for inducing NEMO-IKK  
24 supramolecular structures. *J. Cell Biol.* **204**, 231–45 (2014).
- 25 34. Baranova, N. & Loose, M. *Single-molecule measurements to study polymerization dynamics of*  
26 *FtsZ-FtsA copolymers. Methods in Cell Biology* **137**, (Elsevier Ltd, 2017).

27

28

## 1 **Figure Captions**

### 3 **Figure 1. ZapA changes the architecture of membrane-bound FtsZ/FtsA filament networks**

4 **(A)** Illustration of the experimental assay based on a supported lipid bilayer, purified proteins and TIRF  
5 microscopy **(B)** Snapshots of FtsZ pattern emerging from its interaction with FtsA alone **(i)** and in the  
6 presence of 6 $\mu$ M ZapA **(ii)**. FtsZ (30% Cy5-labelled) and FtsA were kept constant for all experiments (1.5 $\mu$ M  
7 and 0.5 $\mu$ M, respectively). Scale bars, 5 $\mu$ m. **(C)** Estimated mean bundle width,  $\langle \delta \rangle$ , over time for FtsZ/FtsA  
8 filament pattern (blue) and with 6 $\mu$ M ZapA (red). Curves depict the mean and standard deviation (shade  
9 error bands) of independent experiments (FtsZ, n=13, ZapA, n=14) **(D)** Size-exclusion chromatography  
10 results for ZapA wild type (WT) and mutants (ZapA I83E, ZapA R46A) **(E)** Mean bundle width  $\langle \delta_{ss} \rangle$ , of  
11 membrane-bound FtsZ filaments is increased in the presence of 6 $\mu$ M ZapA (red) (pval = 0.006) while it  
12 was unchanged in the presence of ZapA I83E (yellow) and ZapA R46A (green) (pval > 0.05). A two-tailed  
13 Student's t-test was used to compare the mean values in each condition. **(F)** Change in  $\langle \delta_{ss} \rangle$  with varying  
14 concentrations of ZapA. Data shown corresponds to the average bundle width measured between t = 15min  
15 and t = 20 min (mean  $\pm$  s.d). Black line corresponds to Hill equation with  $n_H = 4.12 \pm 6.84$  and  $EC_{50} = 0.69$   
16  $\pm 0.31 \mu$ M.

### 17 **Figure 2. ZapA increases spatial order of FtsZ/FtsA filaments network while decreases its curvature**

18 **(A)** Steady state orientation fields for FtsZ filament network without (left) or with 6.0  $\mu$ M ZapA (right). **(B)**  
19 Curvature maps of orientation fields; white areas correspond to straight filament bundles, red and blue  
20 indicate clockwise or counterclockwise rotation, respectively. The two-dimensional distribution of absolute  
21 curvature values in each frame was plotted over time. Scale bars: large image, 5  $\mu$ m; small image, 2 $\mu$ m.  
22 **(C)** Time-dependent decrease of FtsZ/FtsA filaments alone (left, black to blue gradient) and with 6 $\mu$ M ZapA  
23 (right, black to red gradient) **(D)** The mean curvature,  $\langle k \rangle$ , at each time point, was described by the half-time  
24 of a mono-exponential decay fit to the curvature distribution values. Curves depict the mean and standard  
25 deviation (shade error bands) of independent experiments (FtsZ, n=9, ZapA, n=14). **(E)** Typical spatial  
26 correlation function,  $S(r)$ , for an experiment of FtsZ/FtsA network pattern (left, black to blue gradient) or with  
27 6 $\mu$ M ZapA (right, black to red). FtsZ/FtsA filament bundles show overlapping curves in time (black, t=0min,  
28 to blue, t=30min) while ZapA promoted a shift to higher correlation lengths within the same time frame  
29 (black, t=0min, to red, t=30min), suggesting an increasing spatial order in the system (black, t=0min, to red,  
30 t=30min). **(F)** Temporal changes in the correlation length,  $\langle \rho \rangle$ , of FtsZ/FtsA filament bundles. Correlation  
31 length, given by the intersection line where  $S(r) = 0.5$  (insets in **E**) shows that  $\langle \rho \rangle$  remained constant for  
32 FtsZ/FtsA filaments alone (blue), but showed a continuous increase the presence of 6 $\mu$ M ZapA. Curves  
33 show the mean and standard deviation (shade error bands) of independent experiments (FtsZ, n=6, ZapA,  
34 n=8). **(G)**  $\langle k \rangle$  and  $\langle \rho \rangle$  with varying concentrations of ZapA. As for  $\langle \delta_{ss} \rangle$ , ZapA induced a switch-like behavior  
35 for  $\langle k_{ss} \rangle$  and  $\langle \rho_{ss} \rangle$  ( $n_H = 4.63 \pm 0.84$  and  $k_H = 0.84 \pm 0.05 \mu$ M;  $n_H = 4.68 \pm 2.84$ ,  $k_H = 0.84 \pm 0.17$ , respectively)  
36 with a saturation point at equimolar concentrations with FtsZ. Curves depict the mean and standard

1 deviation (shade error bands) of independent experiments (FtsZ, n=6, ZapA, n=8). **(H,I)** ZapA I83E (yellow)  
2 and R46A (green) did not change significantly any of these parameter once again.

### 3 **Figure 3. ZapA increases persistence of FtsZ filaments**

4 **(A)** In the absence of ZapA (upper panel), the FtsZ filament pattern constantly reorganized and ring-like  
5 structures formed only transiently (red dashed squares). In contrast, in the presence of ZapA (lower panel)  
6 FtsZ assemblies were much more persistent. Scale bars, 2  $\mu\text{m}$  **(B)** The temporal autocorrelation function  
7 of the FtsZ filament network decayed quickly without ZapA (blue), but slowly in the presence of 6.0  $\mu\text{M}$   
8 (red). Each curve represents the mean  $\pm$  s.d (error bands) of independent experiments (FtsZ, n=7, ZapA,  
9 n=11). **(C)** The characteristic correlation time,  $\tau$ , as a function of ZapA concentration. The autocorrelation  
10 curves were fitted to a mono-exponential decay and  $\tau$  was given by the half-time of each decay. Data shown  
11 corresponds do the average  $\tau$  from individual experiments (mean  $\pm$  standard deviation). **(D)** ZapA I83E  
12 (yellow) and R46A (green) did not change the persistence of FtsZ filaments.

### 13 **Figure 4. ZapA has no effect on FtsZ treadmilling dynamics**

14 **(A)** Differential TIRF images allows for tracking polymerization (growth) and depolymerization (shrinkage)  
15 of FtsZ treadmilling. **(B)** Raw image of FtsZ filament network in the presence of 6  $\mu\text{M}$  ZapA overlaid with  
16 the respective differential image showing growing (red) and shrinking (green) ends. Kymographs on the  
17 right show position fluctuations in time along the yellow line. Scale bars, t = 5 s, x = 5  $\mu\text{m}$ . **(C)** Plot profile  
18 along the white line in the Kymograph represents an average of intensities of growing and shrinking ends  
19 from multiple time points along the treadmilling path. Common direction of growth and shrinking reveals the  
20 parallel organization of filament bundles, colocalization indicates the presence of short protofilaments. **(D)**  
21 Velocities distribution of filament growth (FtsZ/FtsA,  $v_+ = 62.5 \pm 4.5$  nm/s, FtsZ/FtsA + ZapA,  $v_+ = 59.9 \pm$   
22 3.5 nm/s) and **(E)** shrinkage (FtsZ/FtsA,  $v_- = 51.8 \pm 6.0$  nm/s, FtsZ/FtsA + ZapA,  $v_- = 50.3 \pm 3.3$  nm/s). Both  
23 show a normal distribution without any significant difference in the mean. **(F, G)** Increasing concentrations  
24 of ZapA did not affect the mean velocity of FtsZ filaments at both ends (n = 45). **(H)** Velocity autocorrelation  
25 revealed that directionality was significantly increased (pval < 0.001) in the presence of 6 $\mu\text{M}$  ZapA ( $v_{\text{corr}}$   
26 (FtsZ) =  $0.226 \pm 0.029$  and  $v_{\text{corr}}$  (ZapA) =  $0.319 \pm 0.014$  for  $\Delta t = 10 - 20\text{s}$ ). **(I)** ZapA mutants did not change  
27 treadmilling directionality (pval > 0.05).

### 28 **Figure 5. ZapA has a faster turnover rate than FtsZ**

29 **(A)** Dual-color TIRF micrograph showing co-localization of Alexa488-FtsZ (cyan) and ZapA-Cy5 (magenta).  
30 **(B)** Single particle tracking (SPT) of FtsZ (red) and ZapA (magenta). Scale bars, 5  $\mu\text{m}$  **(C)** Lifetime  
31 distribution of FtsZ does not change significantly with ZapA (FtsZ-Cy5 =  $6.59 \pm 0.28$  s, blue, n = 5; FtsZ-  
32 Cy5/FtsA + ZapA =  $6.01 \pm 1.24$  s, red, n = 6). In contrast, the lifetime of ZapA was much shorter (ZapA-Cy5  
33 =  $0.95 \pm 0.14$ , n = 5). **(D)** Snapshots showing fluorescence recover after photobleaching (FRAP)  
34 experiments. **(E)** Half-time recovery of FtsZ was not affected by 6 $\mu\text{M}$  ZapA ( $7.63 \pm 1.30$  s and  $6.66 \pm 0.64$   
35 s, respectively), while Cy5-labelled ZapA showed a much faster recovery (ZapA-Cy5 =  $3.01 \pm 0.47$ , n = 6).



## 1 **Figure 6. Cooperative binding of ZapA on FtsZ/FtsA filaments**

2 Binding of ZapA aligns treadmilling FtsZ filaments **(1)**, which in turn facilitates its binding, giving rise to  
3 cooperativity **(2)**. At saturation, four molecules of FtsZ bind to one tetramer of ZapA (1:1 monomer ratio,  
4  $[FtsZ] = [ZapA]$ ) in a parallel fashion **(3)** increasing the bundle width, persistence and alignment of FtsZ  
5 filaments. Treadmilling is not affected due to the transient binding of ZapA **(4)**. This process leads to a shift  
6 from a network of less ordered and highly dynamic FtsZ filaments into a more well-defined track, acting as  
7 an additional fine-tune mechanism for a proper Z-ring alignment without compromising treadmilling  
8 dynamics.

## 9 **Figure S1. Bundle width measurements of FtsZ/FtsA filament networks for ZapA WT and mutants**

10 **(A)** Snapshots of FtsZ pattern emerging from its interaction with FtsA and 0.5 $\mu$ M ZapA **(i)** or 1.5 $\mu$ M ZapA  
11 **(ii)**. **(B)** Estimated  $\langle \delta \rangle$  over time for FtsZ/FtsA filament pattern in each condition (ZapA 0.5  $\mu$ M, brown, n=5;  
12 1.5 $\mu$ M, dark green, n=7). **(C)** Snapshots of FtsZ pattern emerging from its interaction with FtsA and 6 $\mu$ M  
13 ZapA I83E **(i)** or 6 $\mu$ M ZapA R46A **(ii)**. **(D)** Estimated  $\langle \delta \rangle$  over time for FtsZ/FtsA filament pattern in each  
14 condition (ZapA I83E, brown, n = 6; ZapA R46A, dark green, n = 4). Curves depict the mean and standard  
15 deviation (shade error bands) of independent experiments. **(E)** To estimate bundle width, each frame in the  
16 raw data **(i)** was binarized using a threshold plugin **(ii)** and then the Euclidean distance was calculated for  
17 every pixel in that frame **(iii)**. Local peaks in the final gray scale image correspond to half of the bundle  
18 width (red line). **(F)** The mean bundle width over time was given by the peak of widths distribution of each  
19 frame without (left, black to blue) and with ZapA (right, black to red) . Scale bars, 5 $\mu$ m.

## 20 **Figure S2. ZapA decreases FtsZ/FtsA filaments over time**

21 **(A)** Orientation fields and corresponding curvature maps for FtsZ filament network without (upper panel) or  
22 with 6.0  $\mu$ M ZapA (lower panel) over time. Scale bars, 5  $\mu$ m. **(B)** Mean curvature,  $\langle k_{ss} \rangle$  and **(C)** Spatial  
23 correlation,  $\langle S(r)_{ss} \rangle$ , at steady-state for FtsZ/FtsA filaments alone (blue) or upon addition of 6.0  $\mu$ M ZapA  
24 (red). Curves depict the mean and standard deviation (shade error bands) of independent experiments  
25 (for  $\langle k_{ss} \rangle$ , FtsZ, n=9, ZapA, n=14; for  $\langle S(r)_{ss} \rangle$ , FtsZ, n=11, ZapA, n=13).

## 26 **Figure S3. Treadmilling speed of FtsZ/FtsA filaments**

27 **(A)** Illustration showing the outcome of the image subtraction procedure if the treadmilling was happening  
28 in parallel bundles (left panel) or in antiparallel filament bundles (right panel). For antiparallel bundles, we  
29 expect that speckles corresponding to growing and shrinking ends to initially overlap but then move in  
30 opposed directions. **(B)** Speckles intensity from several differential time-lapse movies (growth). Curves  
31 depict the mean and standard deviation (shade error bands) of independent experiments (FtsZ, n=5, ZapA,  
32 n=5). ZapA does not change the intensity of filament speckles, therefore it does not change the polarity of  
33 filaments within FtsZ bundles.

34

1 **Table1. Summary of all the parameters retrieved from the analyses**

2 Weighted mean and respective standard deviation of each parameter for all ZapA concentrations combined,  
3 either below 0.75  $\mu\text{M}$  (low ZapA) or above 1.5  $\mu\text{M}$  (high ZapA). This shows how much the system changed  
4 between the two states.

5 **TableS1. Statistical significance matrix**

6 Each matrix shows the *p value* for all the pairwise combinations of a two-tailed Student's t-tests.

**Fig.1 ZapA changes the large-scale architecture of membrane-bound FtsZ filament networks**

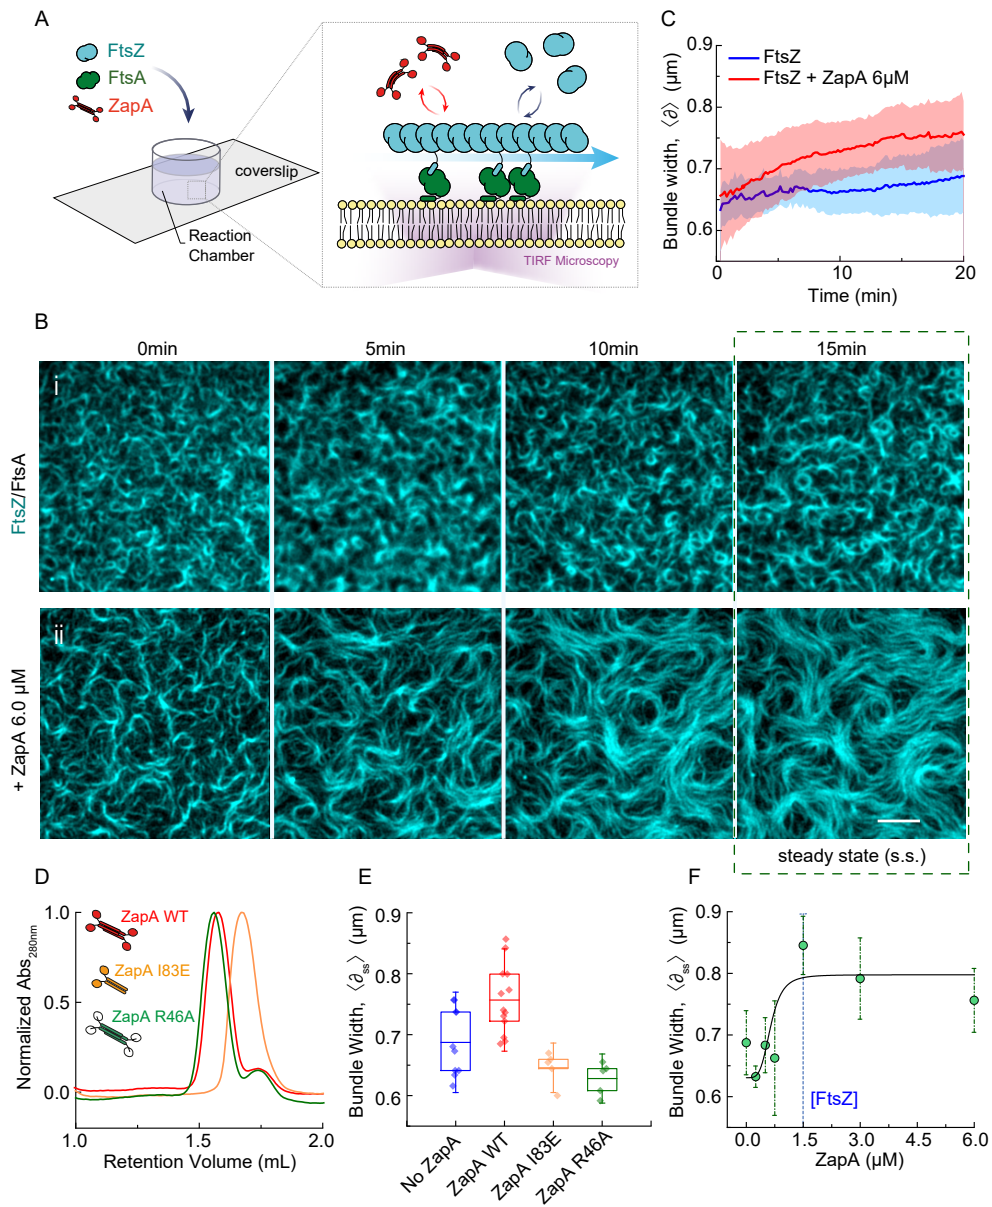

**Fig2. ZapA Increases Order of FtsZ/A Co-Filaments While Decreases their Curvature**

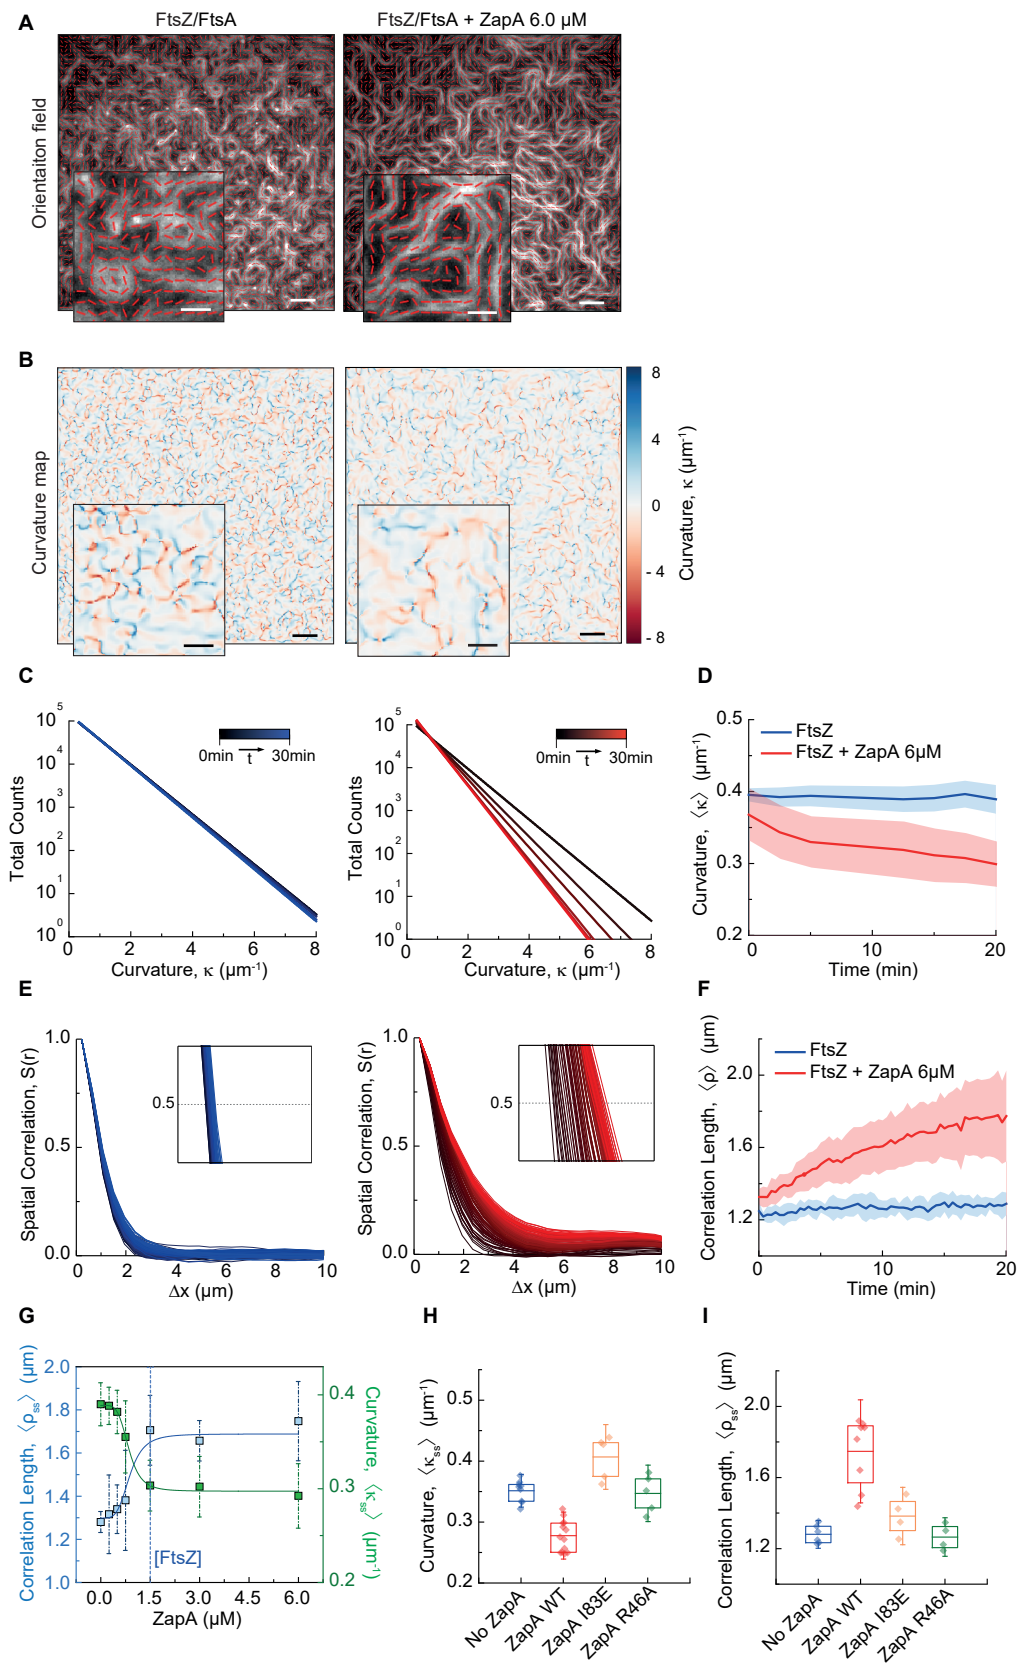

**Fig3. ZapA increases persistence of FtsZ/A co-filaments**

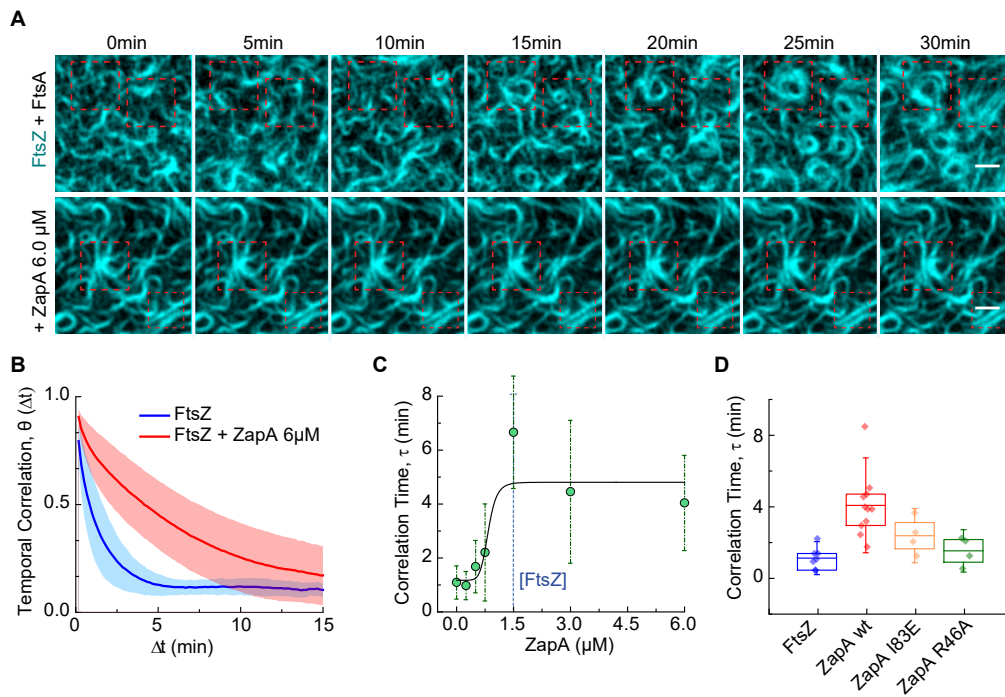

### Fig4 ZapA does not change FtsZ polymerization dynamics

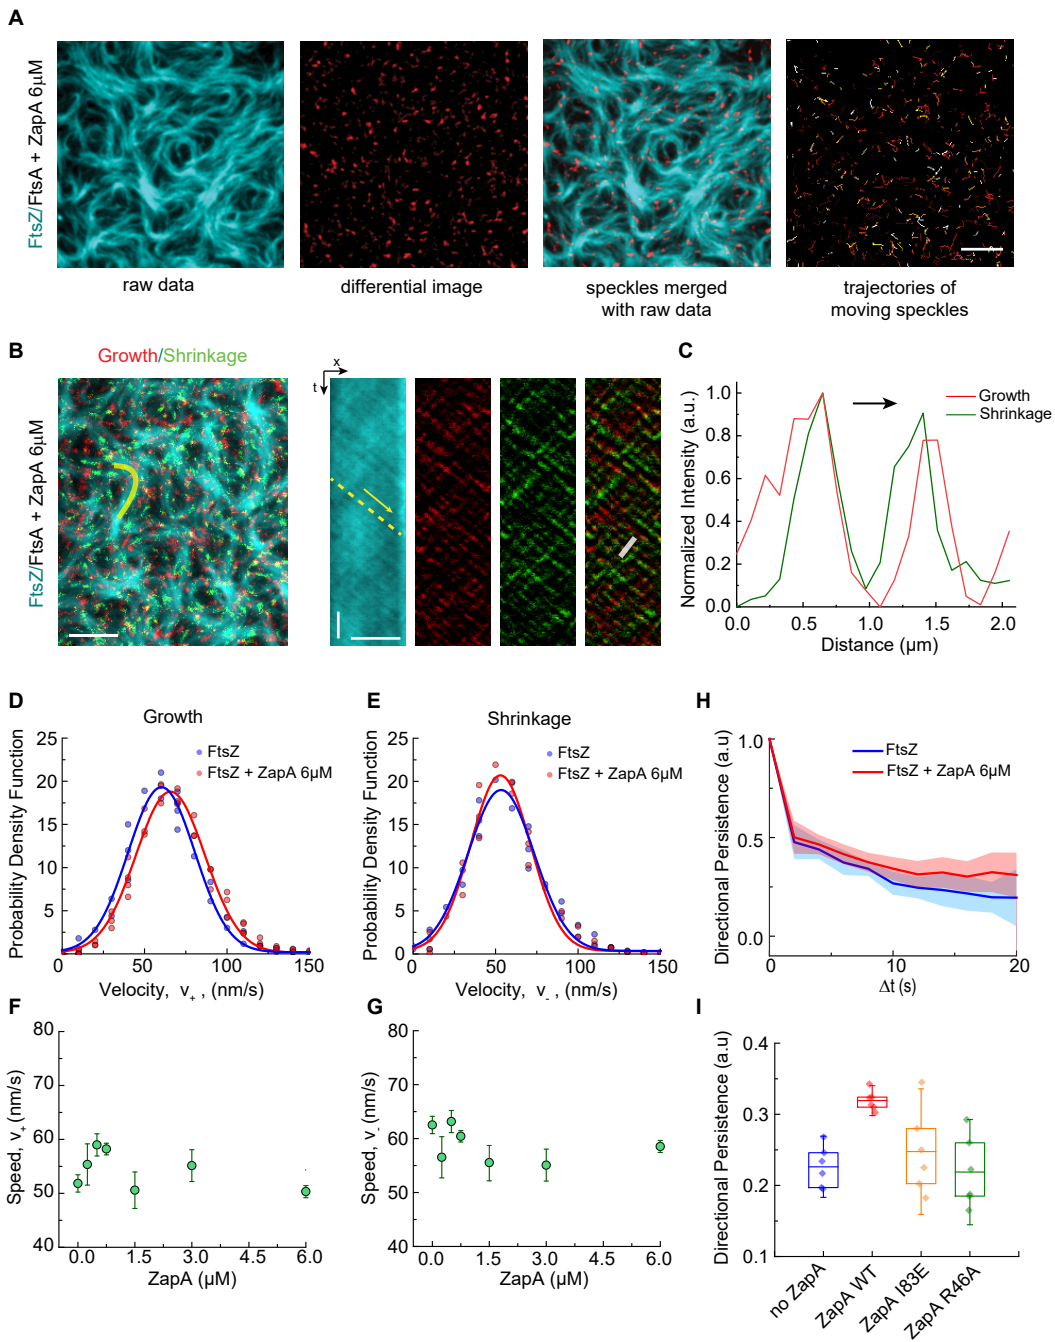

**Fig5. FtsZ and ZapA show Different Underlying Dynamics**

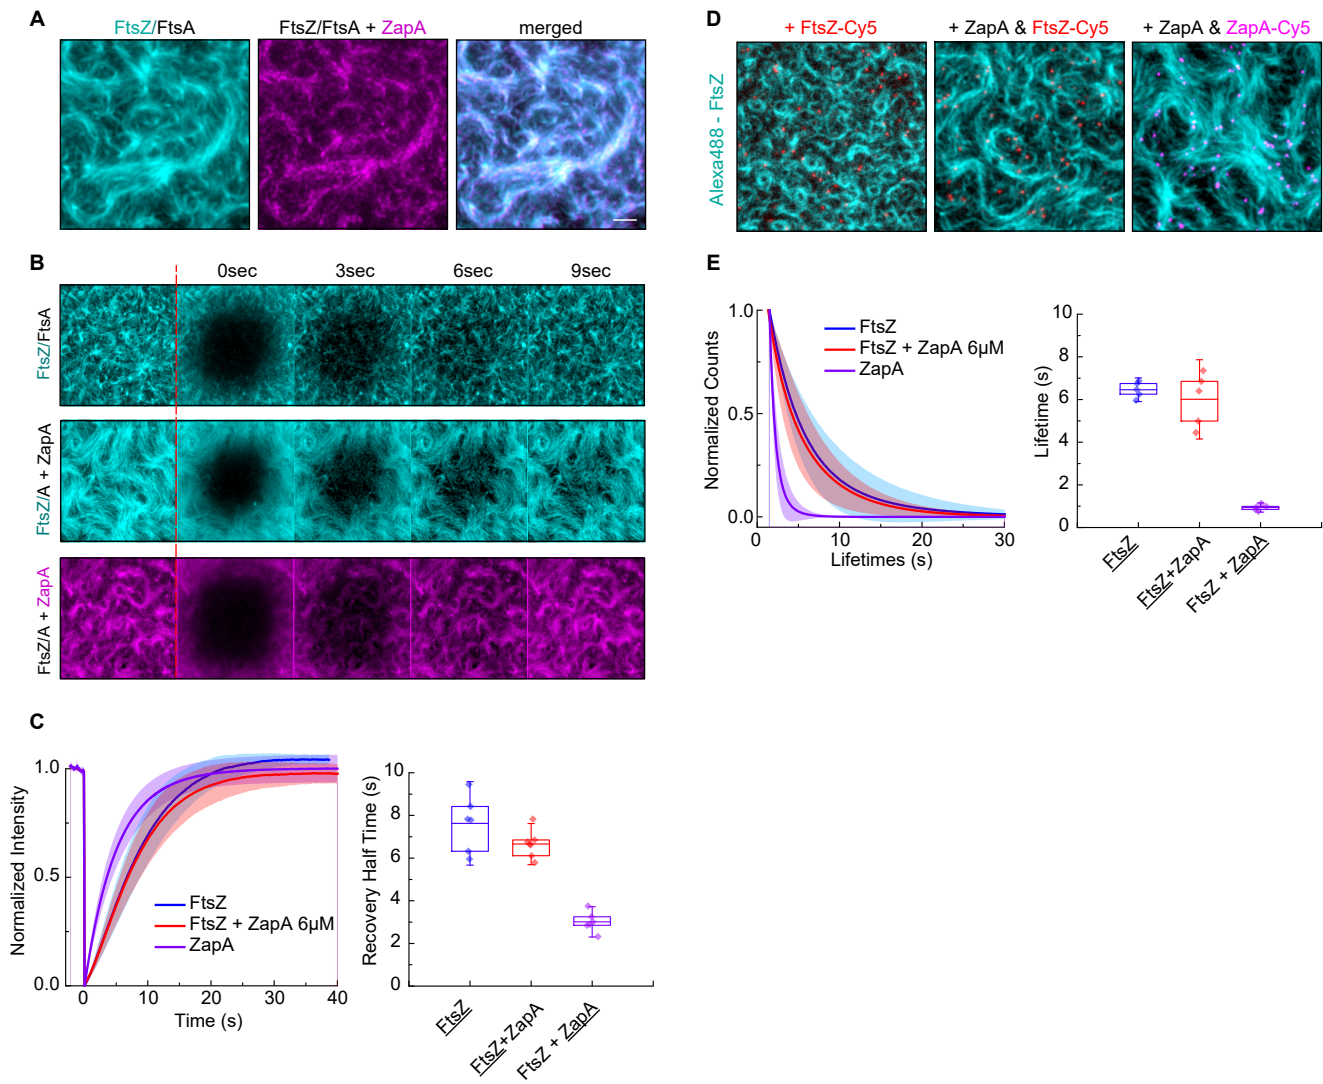

**Fig6.** Cooperative binding of ZapA on FtsZ/FtsA filaments

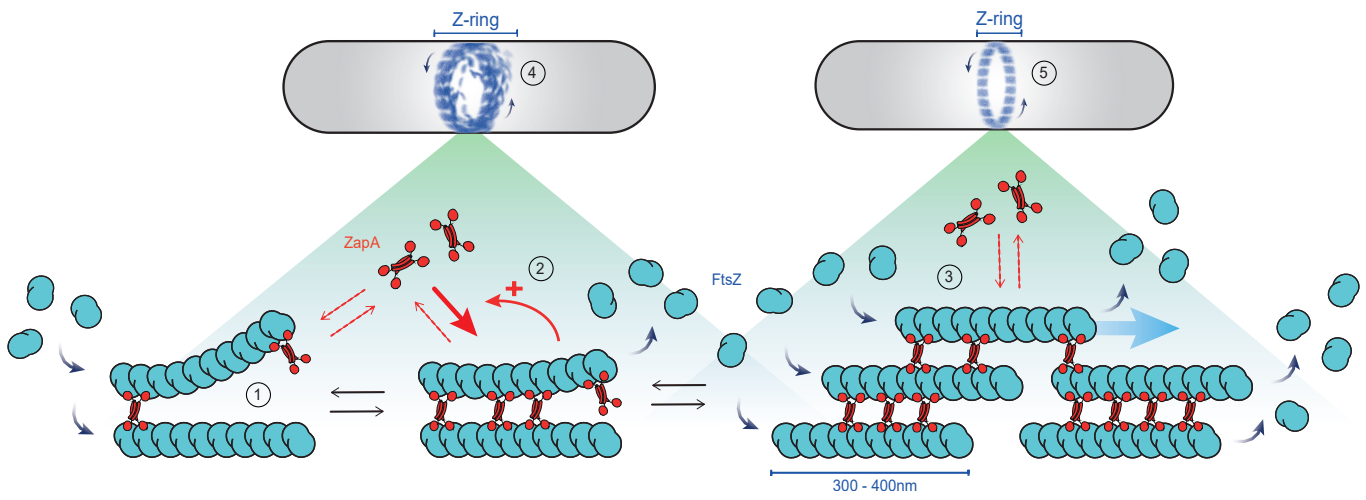



**Table 1: Summary of all the parameters retrieved from the analyses**

|                |             | Low ZapA (< 0.5uM) |      |    | High ZapA (> 1.5uM) |      |    |          |        |
|----------------|-------------|--------------------|------|----|---------------------|------|----|----------|--------|
| Parameter      | Observation | mean               | s.d  | n  | mean                | s.d  | n  | % Change | Figure |
| Bundle width   | ↑           | 0.68               | 0.02 | 18 | 0.78                | 0.02 | 40 | 15%      | Fig.1  |
| Spatial Order  | ↑           | 1.31               | 0.30 | 14 | 1.71                | 0.04 | 21 | 30%      | Fig.2  |
| Curvature      | ↓           | 0.39               | 0.00 | 17 | 0.30                | 0.01 | 34 | 23%      | Fig.2  |
| Persistence    | ↑           | 1.26               | 0.30 | 15 | 5.23                | 1.17 | 34 | 314%     | Fig.3  |
| Growth Rate    | =           | 62.2               | 2.5  | 18 | 57.0                | 1.61 | 23 | n.s      | Fig.4  |
| Shrinkage Rate | =           | 55.6               | 0.9  | 18 | 53.4                | 1.43 | 23 | n.s      | Fig.4  |
| Directionality | ↑           | 0.23               | 0.03 | 10 | 0.32                | 0.01 | 12 | 41%      | Fig.4  |
| Lifetime       | =           | 6.46               | 0.37 | 5  | 6.01                | 0.01 | 5  | n.s      | Fig.5  |
| FRAP Half-Time | =           | 7.63               | 1.30 | 6  | 6.66                | 0.64 | 7  | n.s      | Fig.5  |

| Hill Equation Fitting | EC50        | Hill Coefficient | R <sup>2</sup> |
|-----------------------|-------------|------------------|----------------|
| Bundle Width          | 0.64 ± 0.28 | 4.12 ± 6.84      | 0.68531        |
| Correlation length    | 0.84 ± 0.17 | 4.68 ± 2.84      | 0.95684        |
| Curvature             | 0.85 ± 0.17 | 4.63 ± 0.84      | 0.99581        |
| Correlation Time      | 0.79 ± 0.21 | 4.89 ± 5.13      | 0.81486        |
